# Supplementary material for: TmSpz-like Plays a Fundamental Role in Response to E. coli but Not S. aureus or C. albican Infection in Tenebrio molitor via Regulation of Antimicrobial Peptide Production
Source: MDPI journal article supplement (doi:10.3390/ijms221910888), 2021-10-08
Supplement: s1 [file s1]

Supplementary Materials

# ***TmSpz*-like Plays a Fundamental Role in Response to *E. coli* but Not *S. aureus* or *C. albican* Infection in *Tenebrio molitor* via Regulation of Antimicrobial Peptide Production**

Ho Am Jang <sup>1</sup>, Bharat Bhusan Patnaik <sup>2</sup>, Maryam Ali Mohammadie Kojour <sup>1</sup>, Bo Bae Kim <sup>1</sup>, Young Min Bae <sup>1</sup>, Ki Beom Park <sup>1</sup>, Yong Seok Lee <sup>3</sup>, Yong Hun Jo <sup>1,\*</sup> and Yeon Soo Han <sup>1,\*</sup>

<sup>1</sup> Department of Applied Biology, Institute of Environmentally-Friendly Agriculture (IEFA), College of Agriculture and Life Sciences, Chonnam National University, Gwangju 61186, Korea; hoamjang@gmail.com (H.A.J.); maryam.alimohammadie@gmail.com (M.A.M.K.); kbb941013@gmail.com (B.B.K.); ugisaka@naver.com (Y.M.B.); misson112@naver.com (K.B.P.)

<sup>2</sup> P. G. Department of Bio-Science and Biotechnology, Fakir Mohan University, Balasore 756089, OD, India; drbharatbhusan4@gmail.com

<sup>3</sup> Department of Biology, College of Natural Sciences, Soonchunhyang University, Asan City 31538, Korea; yslee@sch.ac.kr

\* Correspondence: yhun1228@jnu.ac.kr (Y.H.J.); hanyss@jnu.ac.kr (Y.S.H.)

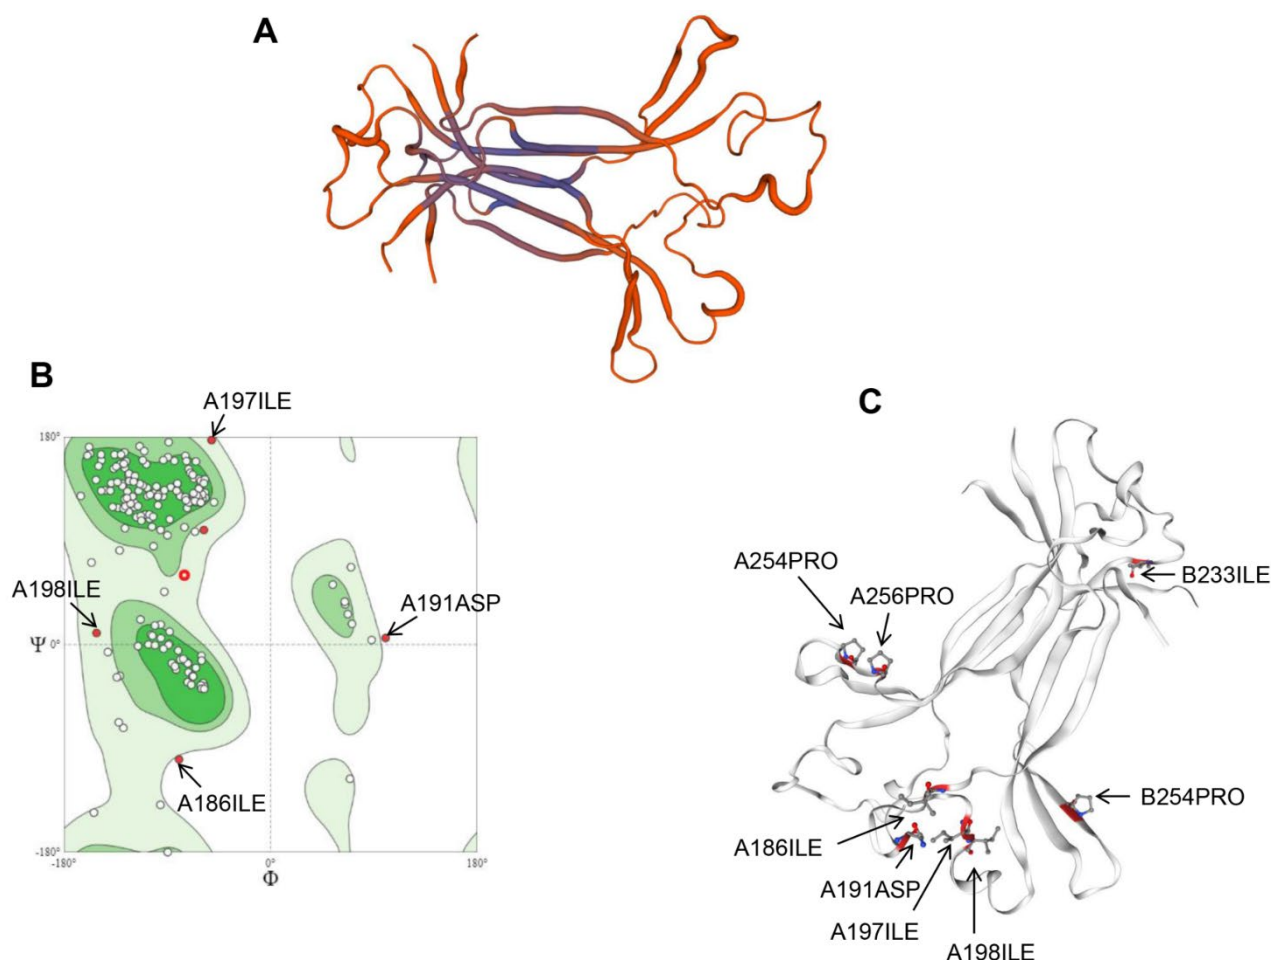

**Figure S1.** Predicted model of *TmSpz*-like using the SWISS-MODEL program. (A) Homology model of *TmSpz*-like based on the reference model [SMTL ID: 3e07.1]. Crystal structure of Spätzle cysteine knot homodimer. (B) Ramachandran plot diagram of *TmSpz*-like that allows a combination of conformational angles psi ( $\psi$ ) and phi ( $\phi$ ). The shaded region

corresponds to allowed conformation of residues. Ramachandran outlier residues are shown in the predicted model. (C) Ramachandran outliers (A-chain: 198ILE, 197ILE, 191ASN, 250PRO, 256PRO; B-chain; 233ILE, 254PRO) constitute 3.94% of the residues of *TmSpz*-like.

**Table S1.** Percentage amino acid sequence identity of *TmSpz*-like with its orthologs in other insects

[illegible]
